# Supplementary material
Source: PubMed Central journal article supplement (PMC2798466)
Supplement: supp_30_2_481__1.pdf [file supp_30_2_481__1.pdf]

### Supplementary Table 1- Cell size and cell number in response to RNAi treatment

Drosophila S2 cells were treated with RNAi molecules targeting the indicated genes along with Tsc2 RNAi. Controls are indicated in green. RNAi molecules that were synthesized in addition to the library are indicated in green.

| RNAi target | Gene name        | Average cell size (fL) | Average cell number | Notes                 |
|-------------|------------------|------------------------|---------------------|-----------------------|
| no Tsc2     |                  | 472                    | 53568               |                       |
| no Tsc2     |                  | 505                    | 35897               |                       |
| no Tsc2     |                  | 520                    | 37928               |                       |
| S6K ctrl    |                  | 533                    | 42980               |                       |
| no Tsc2     |                  | 536                    | 40402.5             |                       |
| Tor ctrl    |                  | 538                    | 47450               |                       |
| no Tsc2     |                  | 540                    | 43179               |                       |
| S6K ctrl    |                  | 541                    | 49530               |                       |
| Tor ctrl    |                  | 545.5                  | 39157               |                       |
| S6K ctrl    |                  | 547                    | 35904               |                       |
| S6K ctrl    |                  | 549                    | 44486               |                       |
| S6K ctrl    |                  | 549                    | 37632               |                       |
| Tor ctrl    |                  | 553                    | 40250               |                       |
| Tor ctrl    |                  | 556                    | 34530               |                       |
| S6K ctrl    |                  | 558                    | 33726               |                       |
| FBgn0021796 | Tor              | 560                    | 40507               |                       |
| Thread      | d-IAP            | 568                    | 20037.5             | dead in one replicate |
| FBgn0036060 | CG14163          | 573                    | 17700.5             | dead in one replicate |
| FBgn0020386 | Pdk1             | 582                    | 36551.5             |                       |
| FBgn0015763 | licorne          | 588                    | 43910.5             |                       |
| Tor ctrl    |                  | 600                    | 30517.5             |                       |
| S6K ctrl    |                  | 604                    | 39975               |                       |
| no Tsc2     |                  | 605                    | 37069.5             |                       |
| FBgn0024329 | Mekk1            | 609                    | 39995               |                       |
| FBgn0011739 | wts              | 620                    | 32161.5             |                       |
| FBgn0040298 | Myt1             | 627.5                  | 38535               |                       |
| FBgn0036511 | CG6498           | 629                    | 37641.5             |                       |
| FBgn0024222 | IKKbeta          | 630                    | 40124               |                       |
| FBgn0013987 | MAPKAP2          | 632.5                  | 37711.5             |                       |
| FBgn0019990 | Gcn2             | 638                    | 36968               |                       |
| FBgn0030735 | CG3632           | 638.5                  | 28855.5             |                       |
| FBgn0015806 | S6K              | 642                    | 39084.5             |                       |
| FBgn0003744 | trc              | 646.5                  | 33273.5             |                       |
| FBgn0004103 | Pp1 (Su(var)3-6) | 648                    | 24658.5             |                       |
| FBgn0004839 | otk              | 651                    | 32935.5             |                       |
| GFP ctrl    |                  | 651                    | 28622.5             |                       |

|             |                |       |         |
|-------------|----------------|-------|---------|
| FBgn0010015 | Calcineruin A1 | 651.5 | 30726   |
| FBgn0011598 | Chk1           | 652   | 39098.5 |
| FBgn0024179 | wit            | 652.5 | 35189   |
| FBgn0037491 | psk            | 653.5 | 29744.5 |
| FBgn0052703 | Erk7           | 655   | 36243.5 |
| FBgn0038534 |                | 658.5 | 35735.5 |
| FBgn0033441 |                | 659.5 | 32771   |
| FBgn0003091 |                | 660   | 35005   |
| FBgn0002938 |                | 661   | 33642   |
| FBgn0010389 |                | 661.5 | 38966   |
| FBgn0003731 |                | 661.5 | 33009   |
| Tsc2 alone  |                | 663   | 28439   |
| FBgn0003165 |                | 664   | 41134   |
| FBgn0003124 |                | 664   | 22705   |
| FBgn0029970 |                | 664.5 | 29342   |
| FBgn0003371 |                | 666   | 28146   |
| FBgn0011817 |                | 668.5 | 36742.5 |
| FBgn0041203 |                | 668.5 | 34755.5 |
| FBgn0003733 |                | 668.5 | 29269.5 |
| FBgn0017558 |                | 669   | 32203   |
| FBgn0020930 |                | 671   | 41657   |
| FBgn0030834 |                | 671   | 35453.5 |
| FBgn0010197 |                | 671   | 29649   |
| FBgn0019686 |                | 671.5 | 40638   |
| FBgn0036551 |                | 671.5 | 30858   |
| FBgn0034789 |                | 672   | 36128   |
| FBgn0033773 |                | 673   | 27760.5 |
| FBgn0032702 |                | 677   | 33635   |
| FBgn0027515 |                | 678   | 31758   |
| FBgn0020391 |                | 678.5 | 35550   |
| FBgn0000721 |                | 678.5 | 37936   |
| FBgn0035001 |                | 679.5 | 34301   |
| FBgn0028427 |                | 680   | 33914.5 |
| FBgn0003366 |                | 680   | 32344.5 |
| FBgn0023081 |                | 680.5 | 34872   |
| FBgn0023508 |                | 681   | 26757   |
| FBgn0025802 |                | 681   | 35039   |
| FBgn0020440 |                | 682   | 34140   |
| FBgn0037164 |                | 682.5 | 32823.5 |
| FBgn0038206 |                | 683.5 | 35842   |
| FBgn0051140 |                | 683.5 | 34483.5 |
| FBgn0040505 |                | 684.5 | 35458   |
| FBgn0028633 |                | 684.5 | 32925   |

|             |       |         |
|-------------|-------|---------|
| FBgn0036896 | 684.5 | 32326   |
| FBgn0032677 | 685   | 35806   |
| FBgn0038736 | 685   | 33985.5 |
| FBgn0038902 | 685.5 | 41073.5 |
| FBgn0000274 | 685.5 | 34356.5 |
| FBgn0013988 | 687   | 36822.5 |
| FBgn0031784 | 687   | 42961   |
| FBgn0036448 | 688.5 | 30158   |
| FBgn0037925 | 689   | 36496   |
| FBgn0035142 | 689   | 34471.5 |
| FBgn0023083 | 689   | 33121.5 |
| FBgn0051183 | 689   | 31782.5 |
| FBgn0036544 | 689.5 | 30532.5 |
| Scar        | 689.5 | 31155   |
| FBgn0031696 | 691   | 33852   |
| FBgn0003317 | 691.5 | 28561   |
| FBgn0044826 | 692   | 35115   |
| FBgn0039083 | 692.5 | 37602   |
| FBgn0039796 | 692.5 | 33693   |
| FBgn0011253 | 693.5 | 35282.5 |
| FBgn0051107 | 693.5 | 30876   |
| FBgn0045980 | 694   | 32312.5 |
| FBgn0035143 | 694   | 32407   |
| FBgn0028497 | 694.5 | 30551   |
| FBgn0010715 | 695   | 35995.5 |
| FBgn0003716 | 695   | 30761.5 |
| FBgn0005592 | 695.5 | 35129   |
| FBgn0004864 | 696   | 45149.5 |
| FBgn0003217 | 696.5 | 35978   |
| FBgn0025625 | 696.5 | 33157   |
| FBgn0036273 | 698   | 24924.5 |
| FBgn0039742 | 698   | 28822.5 |
| FBgn0026323 | 699   | 34861.5 |
| FBgn0037163 | 699   | 33267   |
| FBgn0037167 | 699   | 24002.5 |
| FBgn0052944 | 699.5 | 31742.5 |
| FBgn0013759 | 700   | 39505   |
| FBgn0003132 | 700   | 29024.5 |
| FBgn0016672 | 700   | 32672   |
| FBgn0034691 | 700.5 | 33474.5 |
| FBgn0014073 | 701   | 29771   |
| FBgn0005779 | 701   | 30401   |
| FBgn0037327 | 701.5 | 28921.5 |

|                   |       |         |
|-------------------|-------|---------|
| FBgn0004368       | 701.5 | 28427   |
| FBgn0034179       | 702   | 33962   |
| FBgn0036801       | 702   | 31616.5 |
| FBgn0013984       | 702.5 | 33392   |
| <b>Tsc2 alone</b> | 702.5 | 29754   |
| FBgn0020622       | 703   | 35706   |
| FBgn0027889       | 703   | 32522.5 |
| FBgn0024326       | 703.5 | 26509.5 |
| FBgn0013983       | 704   | 38787.5 |
| FBgn0022800       | 704.5 | 40154   |
| FBgn0034376       | 705   | 33217.5 |
| FBgn0035001       | 705   | 32388.5 |
| FBgn0000229       | 705.5 | 39699.5 |
| FBgn0052743       | 706   | 34767.5 |
| FBgn0037218       | 706   | 34977   |
| FBgn0040335       | 706.5 | 39276   |
| FBgn0004834       | 706.5 | 37259   |
| <b>GFP</b>        | 706.5 | 34279   |
| FBgn0032749       | 706.5 | 31669.5 |
| FBgn0037093       | 707   | 24104   |
| FBgn0000723       | 707   | 34378.5 |
| FBgn0034085       | 707   | 34910.5 |
| FBgn0004370       | 707.5 | 29338   |
| FBgn0015772       | 708   | 30297   |
| FBgn0003432       | 708   | 28860   |
| FBgn0003501       | 708   | 30718   |
| FBgn0015295       | 708.5 | 34612   |
| FBgn0024290       | 708.5 | 26505   |
| FBgn0019949       | 709   | 27417   |
| FBgn0026371       | 709   | 27806   |
| FBgn0022768       | 709   | 26282.5 |
| FBgn0001624       | 709.5 | 39674.5 |
| FBgn0004462       | 709.5 | 37544.5 |
| FBgn0016696       | 709.5 | 32826.5 |
| FBgn0010303       | 709.5 | 30475   |
| FBgn0046706       | 709.5 | 28693   |
| FBgn0039692       | 709.5 | 29990   |
| FBgn0030387       | 709.5 | 22731   |
| FBgn0052484       | 710   | 44092   |
| FBgn0037166       | 710   | 26144.5 |
| FBgn0015277       | 710.5 | 34319.5 |
| FBgn0026181       | 710.5 | 25340.5 |
| FBgn0031855       | 711   | 36840.5 |

|             |       |         |
|-------------|-------|---------|
| FBgn0000273 | 711   | 30795.5 |
| FBgn0015300 | 712   | 37600.5 |
| FBgn0027504 | 712   | 31016.5 |
| FBgn0011737 | 712   | 28661   |
| FBgn0031463 | 712   | 29749   |
| FBgn0003093 | 712.5 | 35624.5 |
| FBgn0036742 | 713   | 32015   |
| FBgn0034295 | 713   | 34285   |
| FBgn0040499 | 713   | 26962   |
| FBgn0037063 | 713   | 32392.5 |
| FBgn0036212 | 713.5 | 25744.5 |
| FBgn0032885 | 714   | 35481   |
| FBgn0027101 | 715   | 28553   |
| FBgn0031299 | 715   | 27912   |
| FBgn0000711 | 715   | 33542.5 |
| FBgn0035133 | 715   | 29713.5 |
| FBgn0037804 | 715.5 | 28691.5 |
| FBgn0001079 | 715.5 | 35140.5 |
| FBgn0035039 | 715.5 | 31460   |
| FBgn0030697 | 715.5 | 31102.5 |
| FBgn0002673 | 715.5 | 36381.5 |
| FBgn0032820 | 716   | 29351   |
| FBgn0004784 | 716.5 | 33003.5 |
| FBgn0010407 | 716.5 | 30194.5 |
| FBgn0004833 | 716.5 | 31148   |
| FBgn0037064 | 716.5 | 33516.5 |
| FBgn0034421 | 717   | 30625.5 |
| FBgn0020412 | 717.5 | 26948.5 |
| FBgn0028741 | 718   | 32788   |
| FBgn0051187 | 718.5 | 33280   |
| FBgn0032363 | 719   | 32364   |
| FBgn0030018 | 719   | 34887   |
| FBgn0037663 | 719.5 | 38654   |
| FBgn0037165 | 719.5 | 30505.5 |
| FBgn0000536 | 720   | 35941.5 |
| FBgn0014006 | 720   | 32552.5 |
| FBgn0033915 | 720   | 26574.5 |
| FBgn0051711 | 720.5 | 35450   |
| FBgn0036550 | 721   | 30885   |
| FBgn0026063 | 721.5 | 35447.5 |
| FBgn0030761 | 721.5 | 26027.5 |
| FBgn0036553 | 721.5 | 28062   |
| Tsc2 alone  | 722   |         |

|             |       |         |
|-------------|-------|---------|
| FBgn0014001 | 722   | 32445.5 |
| FBgn0032632 | 722   | 30510   |
| FBgn0025702 | 723   | 32867   |
| FBgn0011826 | 723.5 | 33183.5 |
| FBgn0025742 | 723.5 | 27716   |
| FBgn0033021 | 724   | 30764   |
| FBgn0000480 | 725   | 38494   |
| FBgn0000489 | 725   | 31616.5 |
| FBgn0013762 | 725.5 | 35919   |
| FBgn0002413 | 725.5 | 33976   |
| FBgn0032999 | 726   | 36154   |
| FBgn0022131 | 726   | 34237.5 |
| FBgn0015278 | 726.5 | 34112.5 |
| FBgn0000259 | 727   | 32502   |
| FBgn0051878 | 727.5 | 31802   |
| FBgn0031044 | 727.5 | 27461.5 |
| FBgn0040056 | 728   | 28005   |
| FBgn0031265 | 728.5 | 37386   |
| FBgn0028360 | 728.5 | 40108   |
| FBgn0016930 | 728.5 | 30756   |
| FBgn0024245 | 728.5 | 32080   |
| FBgn0031294 | 728.5 | 31145   |
| gfp         | 729   | 27523   |
| gfp         | 729   | 33545   |
| FBgn0035425 | 729   | 31017   |
| FBgn0034950 | 729.5 | 29090.5 |
| FBgn0036552 | 729.5 | 31466.5 |
| FBgn0000147 | 730   | 33801   |
| FBgn0005666 | 730.5 | 32541.5 |
| FBgn0032650 | 730.5 | 39056.5 |
| FBgn0025743 | 730.5 | 26831   |
| FBgn0037679 | 730.5 | 30040   |
| FBgn0010909 | 731.5 | 25110.5 |
| FBgn0031795 | 731.5 | 32039   |
| FBgn0000258 | 731.5 | 29503.5 |
| FBgn0027506 | 731.5 | 29826.5 |
| FBgn0039698 | 731.5 | 34795.5 |
| FBgn0010379 | 732   | 29131   |
| FBgn0031441 | 732   | 34187.5 |
| FBgn0003139 | 732   | 25955   |
| FBgn0036844 | 732   | 29598   |
| FBgn0039908 | 733   | 37214   |
| FBgn0028410 | 733.5 | 32307.5 |

|             |       |         |
|-------------|-------|---------|
| FBgn0034950 | 733.5 | 31387   |
| FBgn0025573 | 733.5 | 30315   |
| FBgn0030300 | 734   | 32561   |
| FBgn0025936 | 734   | 34844   |
| FBgn0033791 | 734   | 35114.5 |
| FBgn0032187 | 734   | 35933   |
| FBgn0039015 | 734   | 26764   |
| FBgn0000442 | 734.5 | 33508.5 |
| FBgn0005536 | 734.5 | 31531.5 |
| FBgn0039623 | 735   | 33260   |
| FBgn0015402 | 735.5 | 36787   |
| FBgn0028484 | 735.5 | 30453   |
| FBgn0028489 | 735.5 | 29957   |
| FBgn0004367 | 736   | 26923   |
| FBgn0004889 | 736   | 29093   |
| FBgn0013435 | 736.5 | 32708   |
| FBgn0037098 | 736.5 | 33160   |
| FBgn0029949 | 736.5 | 30016.5 |
| FBgn0036369 | 736.5 | 31344.5 |
| FBgn0052666 | 737   | 35455   |
| FBgn0034137 | 737   | 30420.5 |
| FBgn0037623 | 737   | 30986.5 |
| FBgn0003502 | 737.5 | 30370   |
| FBgn0000464 | 737.5 | 29814.5 |
| FBgn0004876 | 739.5 | 31472   |
| FBgn0031194 | 739.5 | 29208   |
| FBgn0004833 | 741.5 | 31675   |
| FBgn0033244 | 741.5 | 27530.5 |
| FBgn0032673 | 741.5 | 32312   |
| FBgn0015279 | 742.5 | 34285   |
| FBgn0035590 | 742.5 | 29012   |
| FBgn0035228 | 742.5 | 28344   |
| FBgn0011285 | 743.5 | 28996   |
| FBgn0038477 | 743.5 | 29726   |
| FBgn0030465 | 743.5 | 28614   |
| FBgn0003134 | 744   | 28678   |
| FBgn0029958 | 744   | 20636.5 |
| Tsc2 alone  | 744.5 | 29972   |
| FBgn0003138 | 744.5 | 30948.5 |
| FBgn0005777 | 745   | 33652   |
| FBgn0031730 | 745.5 | 33171   |
| FBgn0011300 | 746   | 36108   |
| Tsc2 alone  | 746   | 32106.5 |

|             |       |         |
|-------------|-------|---------|
| FBgn0030758 | 746   | 28363.5 |
| FBgn0034590 | 746.5 | 29869   |
| FBgn0028341 | 747   | 31424   |
| FBgn0028484 | 747.5 | 37613   |
| FBgn0050021 | 747.5 | 37326.5 |
| FBgn0029736 | 747.5 | 27963   |
| FBgn0005778 | 747.5 | 28560   |
| FBgn0038588 | 748   | 30669   |
| FBgn0004366 | 748   | 28076.5 |
| FBgn0026136 | 749.5 | 35804.5 |
| FBgn0029157 | 750   | 26921   |
| FBgn0036111 | 752   | 31003   |
| FBgn0003349 | 752.5 | 30264.5 |
| FBgn0027587 | 752.5 | 26112.5 |
| FBgn0014007 | 753   | 26389.5 |
| FBgn0030976 | 753   | 28448   |
| FBgn0031294 | 753   | 28353   |
| FBgn0004369 | 754   | 29833.5 |
| FBgn0030864 | 754.5 | 28471.5 |
| FBgn0038816 | 755   | 31221.5 |
| FBgn0051187 | 755.5 | 30755.5 |
| FBgn0003140 | 755.5 | 28857.5 |
| FBgn0028978 | 756   | 33106.5 |
| FBgn0045035 | 758.5 | 37119.5 |
| FBgn0024227 | 759.5 | 31838   |
| FBgn0015618 | 760.5 | 33582   |
| FBgn0000382 | 761   | 31114.5 |
| FBgn0003079 | 761.5 | 34480   |
| FBgn0032006 | 761.5 | 29813   |
| FBgn0031799 | 761.5 | 30728   |
| FBgn0024352 | 762.5 | 35590   |
| FBgn0027497 | 763.5 | 28663   |
| Tsc2 alone  | 766   |         |
| GFP         | 766   | 36712.5 |
| FBgn0003169 | 766.5 | 28065   |
| FBgn0039421 | 766.5 | 31272   |
| FBgn0016078 | 767.5 | 29924.5 |
| Tsc2 alone  | 768   | 34080.5 |
| FBgn0029891 | 768   | 31217   |
| FBgn0030556 | 768   | 22626.5 |
| FBgn0013955 | 770.5 | 29157.5 |
| FBgn0003256 | 772   | 34113   |
| Tsc2 alone  | 775   | 29513   |

|             |                      |       |         |
|-------------|----------------------|-------|---------|
| FBgn0046322 |                      | 775   | 18141   |
| FBgn0037325 |                      | 776   | 30882   |
| FBgn0010909 |                      | 778.5 | 30351.5 |
| FBgn0022800 |                      | 778.5 | 31323   |
| Tsc2 alone  |                      | 779   | 30349   |
| FBgn0038167 |                      | 780   | 33916.5 |
| FBgn0037929 |                      | 781   | 31870.5 |
| gfp         |                      | 788.5 | 26688   |
| FBgn0031952 |                      | 789   | 30742.5 |
| FBgn0010441 |                      | 793.5 | 33530.5 |
| FBgn0011829 |                      | 801   | 23172   |
| FBgn0032955 |                      | 803   | 30725.5 |
| FBgn0039694 |                      | 806   | 29792.5 |
| FBgn0004373 |                      | 808   | 27556   |
| FBgn0030384 |                      | 808.5 | 30175   |
| FBgn0010269 |                      | 811.5 | 30798   |
| FBgn0031030 |                      | 812   | 23564.5 |
| FBgn0004210 | puc                  | 812   | 22598.5 |
| FBgn0039111 |                      | 812.5 | 28680.5 |
| FBgn0000826 |                      | 821   | 23401   |
| FBgn0004568 |                      | 822.5 | 28726   |
| FBgn0026379 |                      | 826.5 | 32767.5 |
| FBgn0000017 |                      | 827   | 36375   |
| FBgn0016131 | cdk4                 | 829.5 | 27212   |
| FBgn0015617 | cdk7                 | 832   | 33908   |
| FBgn0033383 | alicorn              | 843.5 | 28621.5 |
| Pbl         | Pbl                  | 845   | 23095   |
| FBgn0039672 | PP2C                 | 849.5 | 27369   |
| FBgn0003525 | stg                  | 853.5 | 25840.5 |
| FBgn0024227 | ial (Aurora-like kin | 873   | 23903.5 |
| FBgn0004177 | mts                  | 884   | 15217   |
| FBgn0036295 | sti (citron-like)    | 915.5 | 29544.5 |
| FBgn0016694 | Pdp1                 | 936   | 29054.5 |
| FBgn0004107 | cdc2c                | 941   | 20245.5 |
| FBgn0004106 | cdc2                 | 941.5 | 8049    |
| FBgn0004624 | CaMKII               | 948.5 | 41899.5 |

mean size    mean number  
714.158177    32206.13747
